# Supplementary material for: It's cool to be dominant: social status alters short-term risks of heat stress
Source: Oxford University Press journal article supplement (doi:10.1242/jeb.152793), 2017-01-01
Supplement: jeb152793supp.pdf [file jeb152793supp.pdf]

Table S1: Ecological details for species used in this study.

| Species                 | Mass (g)                                  | Diurnal $T_b$ (°C)                       | Nocturnal $T_b$ (°C)                     | Diet                  | Range distribution                                                                                                                  | Social system                                                                                                           |
|-------------------------|-------------------------------------------|------------------------------------------|------------------------------------------|-----------------------|-------------------------------------------------------------------------------------------------------------------------------------|-------------------------------------------------------------------------------------------------------------------------|
| Fawn-coloured lark      | 23.9 ± 0.7<br>(22.9 – 25.0)<br><br>N = 6  | 42.5 ± 0.1<br>(42.4 – 42.6)<br><br>N = 6 | 40.5 ± 0.4<br>(40.1 – 40.9)<br><br>N = 6 | Arthropods and seeds. | Arid savanna and woodland of southern Africa, centre of abundance in the Kalahari basin (Botswana, Namibia, northern South Africa). | Socially monogamous, solitary nester. Highly territorial.                                                               |
| African red-eyed bulbul | 28.9 ± 2.1<br>(27.0 – 33.0)<br><br>N = 8  | 43.0 ± 0.3<br>(42.4 – 43.4)<br><br>N = 8 | 40.1 ± 0.4<br>(39.6 – 40.6)<br><br>N = 8 | Fruit and arthropods. | Widespread in arid and semi-arid regions of southern Africa including Botswana, Namibia, central and northern South Africa.         | Socially monogamous, solitary nester. Forages in pairs or small, loose groups.                                          |
| Sociable weaver         | 24.0 ± 0.9<br>(22.6 – 25.4)<br><br>N = 11 | 42.7 ± 0.5<br>(42.0 – 43.5)<br><br>N = 9 | 39.5 ± 0.5<br>(38.6 – 40.3)<br><br>N = 9 | Seeds and arthropods. | Arid savanna and woodland of Namibia, southeastern Botswana and northwestern South Africa.                                          | Year-round stable colonies up to 500+ birds, containing multiple breeding pairs assisted by helpers. Forages in flocks. |

Mass and body temperature ( $T_b$ ) data were collected during this study; mass refers to the mean capture mass of individuals;  $T_b$  are individual means. Means are given ± 1 standard deviation, range in parentheses. Diet, range and social system information are drawn from Hockey, P. A. R., Dean, W. R. J. and Ryan, P. G. eds. (2005). *Roberts Birds of Southern Africa*. 7th ed. Cape Town: The Trustees of the John Voelcker Bird Book Fund.

Table S2: Behavioural thermoregulatory strategies (panting, activity reduction and shade seeking) as a function of mass, sex, social rank (1 = highest) and air temperature.

| Species            | Strategy      | Mass (g)                                                    | Sex                                                     | Social rank                                                 | Ta (°C)                                                     | N  |
|--------------------|---------------|-------------------------------------------------------------|---------------------------------------------------------|-------------------------------------------------------------|-------------------------------------------------------------|----|
| Fawn-coloured lark | Panting       | <b>-1.03</b><br><b>(-1.91 – -0.15),</b><br><b>z = -2.82</b> |                                                         | 0.14<br>(-0.16 – 0.44),<br>z = 1.13                         | <b>0.22</b><br><b>(0.09 – 0.36),</b><br><b>z = 4.07</b>     | 6  |
|                    | Activity      | -0.28<br>(-0.95 – 0.40),<br>z = -0.98                       |                                                         | 0.10<br>(-0.15 – 0.36),<br>z = 0.96                         | 0.004<br>(-0.05 – 0.06),<br>z = 0.16                        | 6  |
|                    | Shade-seeking | 0.52<br>(-0.17 – 1.20),<br>z = 1.80                         |                                                         | <b>-0.36</b><br><b>(-0.64 – -0.08),</b><br><b>z = -3.06</b> | <b>0.20</b><br><b>(0.11 – 0.29),</b><br><b>z = 5.40</b>     | 6  |
| Red-eyed bulbul    | Panting       | 0.04<br>(-0.10 – 0.19),<br>z = 0.76                         | <b>1.65</b><br><b>(0.29 – 3.01),</b><br><b>z = 3.10</b> | <b>0.31</b><br><b>(0.04 – 0.57),</b><br><b>z = 2.97</b>     | <b>0.28</b><br><b>(0.19 – 0.37),</b><br><b>z = 7.97</b>     | 10 |
|                    | Activity      | -13.2<br>(-9950 – 9920),<br>z = -0.003                      | -28.6<br>(-4.23e06 – 4.23e06),<br>z = 0.00              | -1.27<br>(-995 – 992),<br>z = -0.003                        | 0.02<br>(-0.03 – 0.07),<br>z = 0.95                         | 10 |
|                    | Shade-seeking | -0.02<br>(-0.16 – 0.11),<br>z = -0.44                       | -0.44<br>(-1.60 – 0.71),<br>z = -0.98                   | -0.20<br>(-0.42 – 0.03),<br>z = -2.21                       | <b>0.11</b><br><b>(0.06 – 0.16),</b><br><b>z = 5.75</b>     | 10 |
| Sociable weaver    | Panting       | 0.15<br>(-0.38 – 0.68),<br>z = 0.74                         | -0.98<br>(-2.61 – 0.66),<br>z = -1.55                   | 0.16<br>(-0.07 – 0.39),<br>z = 1.80                         | <b>0.35</b><br><b>(0.19 – 0.52),</b><br><b>z = 5.53</b>     | 11 |
|                    | Activity      | -0.16<br>(-0.45 – 0.13),<br>z = -1.40                       | 0.30<br>(-0.54 – 1.14),<br>z = 0.91                     | -0.04<br>(-0.15 – 0.08),<br>z = -0.88                       | <b>-0.07</b><br><b>(-0.12 – -0.03),</b><br><b>z = -4.13</b> | 11 |
|                    | Shade-seeking | 0.02<br>(-0.25 – 0.29),<br>z = 0.20                         | -0.53<br>(-1.30 – 0.24),<br>z = -1.75                   | -0.03<br>(-0.14 – 0.08),<br>z = -0.74                       | <b>0.19</b><br><b>(0.13 – 0.24),</b><br><b>z = 8.92</b>     | 11 |

Data are model estimates (95% CIs), z-values. All 95% CIs for interaction terms included zero, so were excluded from the models. Sex is not included for fawn-coloured larks as all were male. Models are GLMMs with binomial error distribution (1 = panting, 0 = not panting; 1 = active, 0 = inactive; 1 = shade, 0 = sun) and logit link function with individual bird identity as a random factor. Bold indicates 95% CIs excluding zero.

Table S3: Nocturnal body temperature ( $T_b$ ) as a function of mass, sex, social rank (1=highest), air temperature ( $T_a$ ).

| Species            | Mass (g)                                                | Sex                                                     | Social rank                                                 | $T_a$ (°C)                                               | Mass: $T_a$                                               | Sex: $T_a$                                                  | Rank: $T_a$ | N |
|--------------------|---------------------------------------------------------|---------------------------------------------------------|-------------------------------------------------------------|----------------------------------------------------------|-----------------------------------------------------------|-------------------------------------------------------------|-------------|---|
| Fawn-coloured lark | <b>0.50</b><br><b>(0.27 – 0.73),</b><br><b>t = 5.21</b> |                                                         | <b>-0.13</b><br><b>(-0.22 – -0.04),</b><br><b>t = -3.51</b> | 0.004<br>(-0.008 – 0.02),<br>t = 0.78                    |                                                           |                                                             |             | 6 |
| Red-eyed bulbul    | -0.53<br>(-1.18 – 0.12),<br>t = -2.09                   | <b>3.12</b><br><b>(0.41 – 5.84),</b><br><b>t = 2.93</b> | -0.24<br>(-0.62 – 0.13),<br>t = -1.63                       | -0.35<br>(-0.83 – 0.12),<br>t = -1.91                    | <b>0.02</b><br><b>(0.0003 – 0.03),</b><br><b>t = 2.58</b> | <b>-0.17</b><br><b>(-0.27 – -0.07),</b><br><b>t = -4.49</b> |             | 7 |
| Sociable weaver    | -0.34<br>(-0.80 – 0.11),<br>t = -1.93                   | 0.43<br>(-0.67 – 1.53),<br>t = 0.99                     | 0.06<br>(-0.08 – 0.21),<br>t = 1.06                         | <b>0.12</b><br><b>(0.11 – 0.13),</b><br><b>t = 30.19</b> |                                                           |                                                             |             | 9 |

Data are model estimates (95% CIs), t-values. Interactions were removed from models if 95% CIs included zero. Sex is not included for fawn-coloured larks as all individuals were male. Effect size for sex is the difference between mean  $T_b$  for males compared to females, for other variables is change in  $T_b$  per 1 unit increase in the predictor variable. All were fitted as general linear mixed models with Gaussian error distribution and identity link function and contained individual bird identity as a random factor. Bold indicates 95% CI exclude zero.

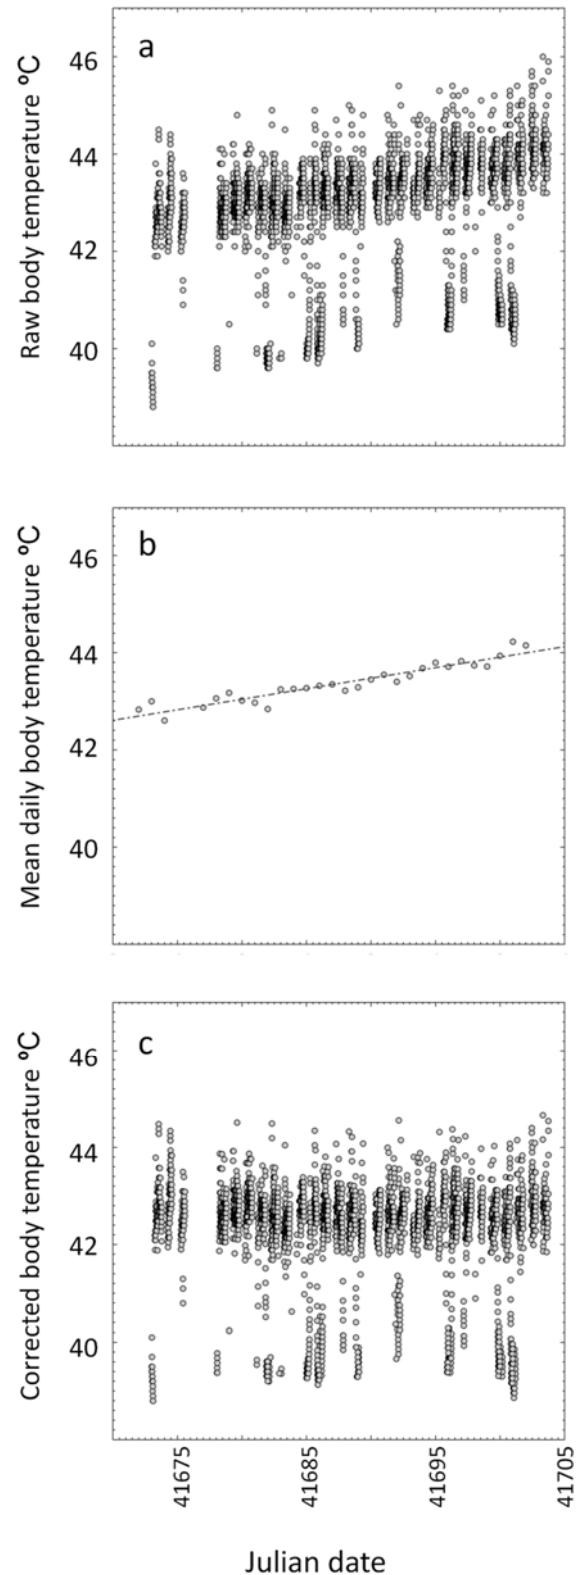

**Fig. S1: Correcting drift in radio-transmitter body temperature readings. Example given is red-eyed bulbul APG.** (a) Raw data downloaded from the transmitter shows distinct upward drift through time; (b) mean daily body temperature is calculated and a linear model fitted to extract the slope of drift ( $m$  in  $y=mx+c$ ); (c) data are corrected back to horizontal by applying the formula  $y_{\text{corrected}} = y - mx$ .

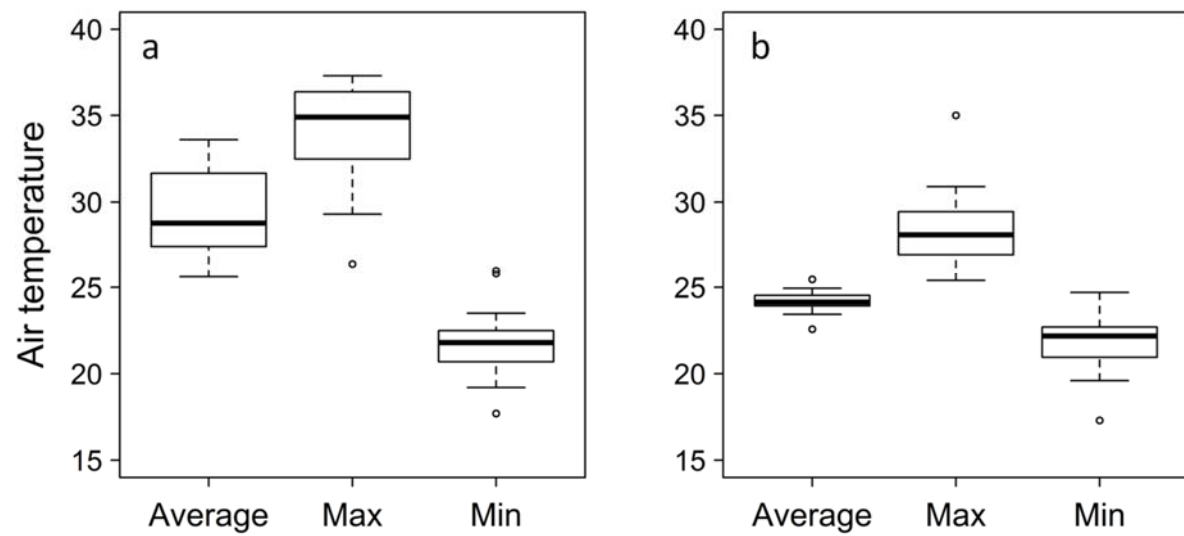

**Fig. S2: Daily (a) diurnal and (b) nocturnal average, maximum and minimum temperatures recorded during the study period.** The overall average air temperature recorded was  $27.3 \pm 4.9$  °C (range 17.3 - 37.3°C).

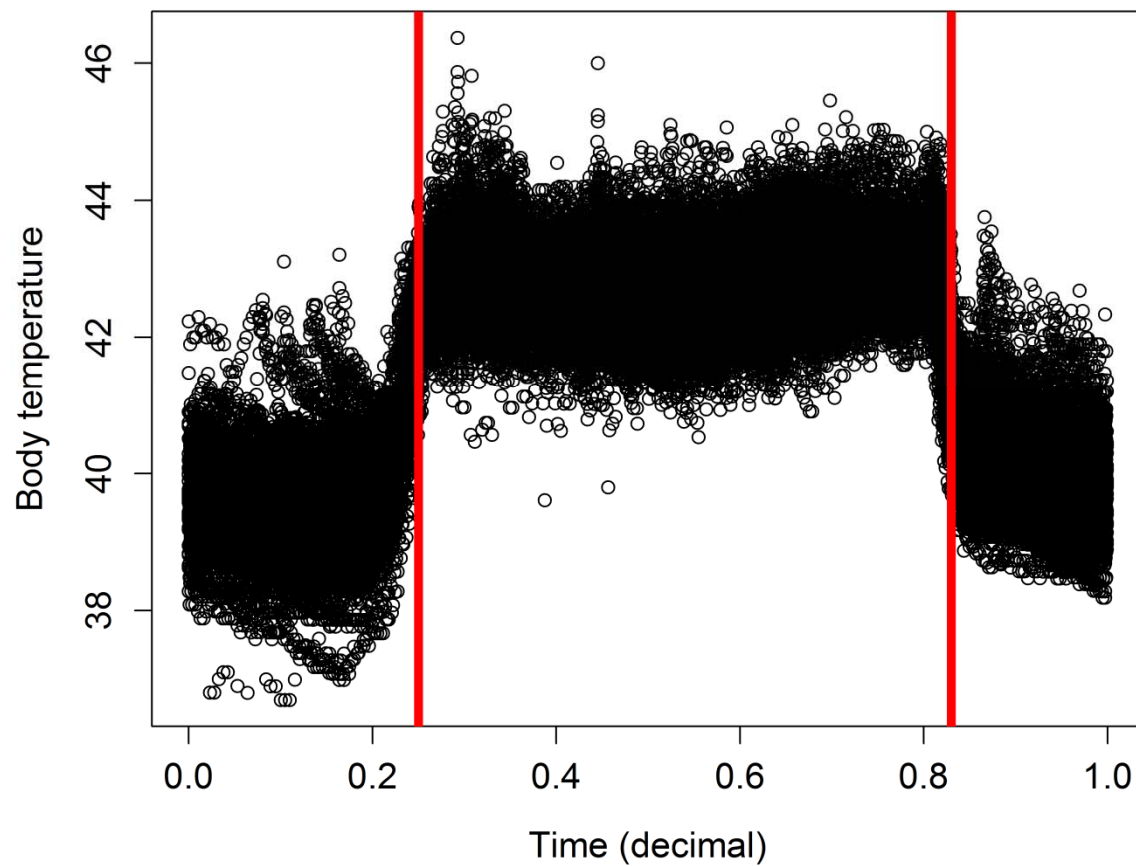

**Fig. S3: Overlaid raw drift-corrected body temperature data from all birds collected across the entire study period.** Time of day is presented on a decimal scale on the x-axis (0.0 corresponds to midnight, 0.5 to noon); birds' body temperature on the y-axis. The vertical red lines correspond to 6:00am and 8:00pm, the cut-off points we chose to divide the data into "diurnal" and "nocturnal" periods.
